# Supplementary material for: Clinical Evaluation Based on a New Approach to Improve the Accuracy of 4β-Hydroxycholesterol Measurement as a Biomarker of CYP3A4 Activity
Source: MDPI journal article supplement (doi:10.3390/molecules28041576), 2023-02-07
Supplement: s1 [file s1]

*Supplementary Materials*

# Clinical Evaluation Based on a New Approach to Improve the Accuracy of 4 $\beta$ -Hydroxycholesterol Measurement as a Biomarker of CYP3A4 Activity

Yuki Taya <sup>1,2</sup>, Mari Mizunaga <sup>2</sup>, Shunsuke Nakao <sup>2</sup>, Mirinthorn Jutanom <sup>1</sup>, Naoki Shimizu <sup>1</sup>,  
Yukihiro Nomura <sup>2</sup> and Kiyotaka Nakagawa <sup>1,\*</sup>

<sup>1</sup> Laboratory of Food Function Analysis, Graduate School of Agricultural Science, Tohoku University, Sendai 980-8572, Miyagi, Japan; yuki.taya@jt.com (Y.T.); jutanom.mirinthorn.d1@tohoku.ac.jp (M.J.); naoki.shimizu.c2@tohoku.ac.jp (N.S.)

<sup>2</sup> Drug Metabolism and Pharmacokinetics Research Laboratories, Central Pharmaceutical Research Institute, Japan Tobacco Inc., Takatsuki 569-1125, Osaka, Japan; mari.mizunaga@jt.com (M.M.); shunsuke.nakao@jt.com (S.N.); yukihiro.nomura@jt.com (Y.N.)

\* Correspondence: kiyotaka.nakagawa.c1@tohoku.ac.jp; Fax: +81-22-757-4417

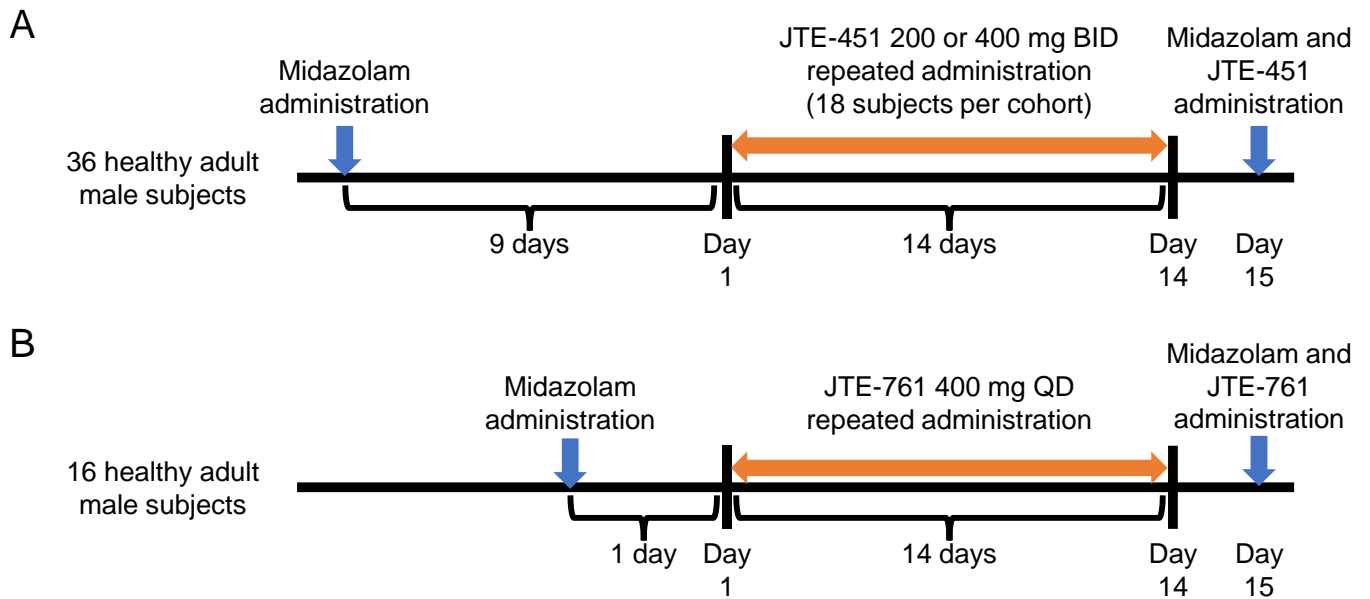

**Figure S1.** The dosing schedules of JTE-451 (A) and JTE-761 (B) in clinical DDI studies. The clinical DDI study of JTE-451 was conducted in 36 healthy adult male subjects. Thirty-six subjects were enrolled into two cohorts where subjects received either 200 or 400 mg BID dosing of JTE-451 (18 subjects per cohort). All subjects received a single oral dose of 3 mg midazolam 9 days prior to administration of JTE-451. Then, JTE-451 was administered for 14 consecutive days (Days 1 to 14). On Day 15, JTE-451 was co-administered with 3 mg midazolam. The clinical DDI study of JTE-761 was conducted in 16 healthy adult male subjects. Sixteen subjects were enrolled in a cohort where subjects received 400 mg QD dosing of JTE-761. All subjects received a single oral dose of 3 mg midazolam 1 day prior to administration of JTE-761. Then, JTE-761 was administered for 14 consecutive days (Days 1 to 14). On Day 15, JTE-761 was co-administered with midazolam.

**Table S1.** The parameters of LC-MS/MS and LC-HRMS.

| <b>Parameters</b>      | <b>LC-MS/MS</b> | <b>LC-HRMS</b> |
|------------------------|-----------------|----------------|
| Ion spray voltage (V)  | 4500            | 5500           |
| Temperature (°C)       | 450             | 500            |
| Curtain gas (psi)      | 30              | 25             |
| Ion source gas 1 (psi) | 60              | 50             |
| Ion source gas 2 (psi) | 80              | 50             |
| Collision gas (psi)    | 8               | -              |
